# Supplementary material
Source: HighWire-hosted journal article supplement (https://bmjopen.bmj.com/content/15/5/e095504)
Supplement: inline-supplementary-material-2 [file inline-supplementary-material-2.pdf]

**Supplementary Table 1.** Recorded complications of the MERCURI-2 trial

**Complications**

|                                                     |
|-----------------------------------------------------|
| Arrythmia                                           |
| Myocardial infarction                               |
| Heart failure/ pleural effusion                     |
| Pericarditis/ pericardial effusion                  |
| Pneumothorax                                        |
| Cerebrovascular stroke or haemorrhage               |
| Sternal wound infections                            |
| Pneumonia                                           |
| Sepsis/ bacteraemia                                 |
| Urinary tract infections                            |
| Delirium                                            |
| Coagulation disorders                               |
| Deep venous thrombosis/ pulmonary embolus           |
| Re-operation                                        |
| Complications already defined as secondary outcomes |
